# Supplementary material for: Where do we belong? Convivial data practices for mapping belongingness in the NEB-STAR Utrecht experiment
Source: Research Square preprint supplement (doi:10.21203/rs.3.rs-8253226/v1), 2026-02-03
Supplement: Supplementary file 1 [file 91db9d984354a7ce93e158ce.docx]

**Supplementary Material**

**Supplementary Material 1:** Utrecht - Sample of the Text Corpus.

| **DOC** | **TEXT** |
| --- | --- |
| **DOC 1** | I enjoyed how mixed this area is in terms of ethnicity, and it’s also pretty. Café Moos. Nice bar with young people from the neighbourhood. I come here daily; however, the decor is lacking. Well-maintained parks, beautiful homes |
| **DOC 2** | My house |
| **DOC 3** | I come to this coffee shop more often. Diversity, non-conformism and non-dogmatism. |
| **DOC 4** | Allowed to be who you are, free, no-judgement |
| **DOC 5** | Cultural centre, here I see friends and make music together, I feel comfortable and like I’m part of something. The shops and walkable streets. |
| **DOC 6** | Really feels like a lively neighbourhood shopping street. The fact that the shops are there, and you can walk around without feeling stressed. Cozy. Nice vibe and people around. ACU. Love the little cinema here. Cozy atmosphere in the library, bookstore, coffee bar. Peaceful and beautiful. Cozy, almost village-like. In the city centre for sure. As an expat, I live in Zuilen which is lovely but not always accepting of expats.I feel a sense of belonging at ACU, there are many other international students, and I can have great discussions about politics and life over a free dinner. I go there with my friends but also always meet interesting new people. The Oudegracht with all the restaurants, cafes. The canals are what Utrecht is known for, always meeting a familiar face and strolling around. Less crowded than the area near Oudaen, so more cozy. Quiet, nice people, beautiful building. I live here so in general I believe I belong in Utrecht. Everyone is welcoming, inclusive, retro decoration. Come very often. Sentimental, my parents went there as students, a quiet spot in the city. |
| **DOC 7** | People greet each other on the street, have a chat. Home, nice people. Mix of people, everyone is welcome regardless of background. |
| **DOC 8** | Resident for 13 years now. Being at home there. |
| **DOC 9** | Home |
| **DOC 10** | Market. I work here. Stadskantoor - with many colleagues I've known for years (community). The station and the surrounding area feel like coming home. I work here, my colleagues. Tivoli Vredenburg. Meeting point, family. |
| **DOC 11** | Live there |
| **DOC 12** | It’s silent. Safe feeling and feeling at home. Huis van Vrede is a beautiful place where different communities are ready to help each other and there’s always a place to rest. |
| **DOC 13** | Many nationalities, I live here, people help each other. Growing up here. Growing up here. Growing up here. Home, not perfect but I live there. Pleasant environment, friendly with people. Different culture. |

**Supplementary Material 2**: Utrecht – Sample of NEB-STAR Topic Vocabulary: Belongingness.

|  | **WORD** | **STEM WORD** |
| --- | --- | --- |
| **Belongingness** | mixed | mix |
|  | area | area |
|  | ethnicity | ethnic |
|  | café | café |
|  | nice | nice |
|  | bar | bar |
|  | young | young |
|  | people | peopl |
|  | neighbourhood | neighbor |
|  | decor | decor |
|  | parks | park |
|  | beautiiful | beaut |
|  | homes | home |
|  | house | hous |
|  | shop | shop |
|  | diversity | divers |

**Supplementary Material 3:** Utrecht – TF/IDF values and normalized TF/IDF values by Belongingness Category.

|  | **DOC 1** | **DOC 2** | **DOC 3** | **DOC 4** | **DOC 5** | **DOC 6** | **DOC 7** | **DOC 8** | **DOC 9** | **DOC 10** |
| --- | --- | --- | --- | --- | --- | --- | --- | --- | --- | --- |
| **TF/IDF** | 1,10 | 0,94 | 0,85 | 0,78 | 0,94 | 0,93 | 1,38 | 0,97 | 1,46 | 0,86 |
| **TF/IDF norm** | 0,49 | 0,41 | 0,38 | 0,34 | 0,41 | 0,41 | 0,61 | 0,43 | 0,64 | 0,38 |
|  |  |  |  |  |  |  |  |  |  |  |
|  | **DOC 11** | **DOC 12** | **DOC 13** | **DOC 14** | **DOC 15** | **DOC 16** | **DOC 17** | **DOC 18** | **DOC 19** | **DOC 20** |
| **TF/IDF** | 2,06 | 0,98 | 1,33 | 1,03 | 0,92 | 1,07 | 1,07 | 0,81 | 1,02 | 1,27 |
| **TF/IDF norm** | 0,91 | 0,43 | 0,59 | 0,46 | 0,41 | 0,47 | 0,47 | 0,36 | 0,45 | 0,56 |
|  |  |  |  |  |  |  |  |  |  |  |
|  | **DOC 21** | **DOC 22** | **DOC 23** | **DOC 24** | **DOC 25** | **DOC 26** | **DOC 27** | **DOC 28** | **DOC 29** | **DOC 30** |
| **TF/IDF** | 0,94 | 0,81 | 0,77 | 1,24 | 1,31 | 0,73 | 0,96 | 1,12 | 1,38 | 0,82 |
| **TF/IDF norm** | 0,42 | 0,36 | 0,34 | 0,55 | 0,58 | 0,32 | 0,43 | 0,49 | 0,61 | 0,36 |
|  |  |  |  |  |  |  |  |  |  |  |
|  | **DOC 31** | **DOC 32** | **DOC 33** | **DOC 34** | **DOC 35** | **DOC 36** | **DOC 37** | **DOC 38** | **DOC 39** | **DOC 40** |
| **TF/IDF** | 0,82 | 1,06 | 1,13 | 1,26 | 0,68 | 0,90 | 1,65 | 2,27 | 0,00 | 0,00 |
| **TF/IDF norm** | 0,36 | 0,47 | 0,50 | 0,55 | 0,30 | 0,40 | 0,73 | 1,00 | 0,00 | 0,00 |
|  |  |  |  |  |  |  |  |  |  |  |
|  | **DOC 41** | **DOC 42** | **DOC 43** | **DOC 44** | **DOC 45** | **DOC 46** | **DOC 47** | **DOC 48** | **DOC 49** | **DOC 50** |
| **TF/IDF** | 0,00 | 0,67 | 0,67 | 0,89 | 1,22 | 0,81 | 1,38 | 1,07 | 1,07 | 0,95 |
| **TF/IDF norm** | 0,00 | 0,30 | 0,30 | 0,39 | 0,54 | 0,36 | 0,61 | 0,47 | 0,47 | 0,42 |
|  |  |  |  |  |  |  |  |  |  |  |
|  | **DOC 51** | **DOC 52** | **DOC 53** | **DOC 54** | **DOC 55** | **DOC 56** | **DOC 57** | **DOC 58** |  |  |
| **TF/IDF** | 1,09 | 0,98 | 0,90 | 0,89 | 1,10 | 1,12 | 1,50 | 1,42 |  |  |
| **TF/IDF norm** | 0,48 | 0,43 | 0,40 | 0,39 | 0,48 | 0,50 | 0,66 | 0,63 |  |  |

**Supplementary Material 4:** Utrecht – Fuzzy Membership Functions.

| **Type** | **R-function** |
| --- | --- |
| Label | Very Low |
| a | 20,00 |
| c | 35,00 |
| **Type** | **Triangular** |
| Label | Low |
| a | 20,00 |
| c | 35,00 |
| b | 45,00 |
| **Type** | **Triangular** |
| Label | Medium |
| a | 35,00 |
| c | 45,00 |
| b | 63,00 |
| **Type** | **Triangular** |
| Label | High |
| a | 45,00 |
| c | 63,00 |
| b | 100,00 |
| **Type** | **L-function** |
| Label | Very High |
| d | 63,00 |
| b | 100,00 |
|  |  |

**Supplementary Material 5:** Fuzzy Partition of Belongingness by Neighbourhood

|  |  | **Very Low** | **Low** | **Medium** | **High** | **Very High** |
| --- | --- | --- | --- | --- | --- | --- |
| **DOC 1** | 2e Daalsebuurt en omgeving | 0,00 | 0,00 | 0,80 | 0,20 | 0,00 |
| **DOC 2** | Abstede, Tolsteegsingel e.o. | 0,00 | 0,36 | 0,64 | 0,00 | 0,00 |
| **DOC 3** | Bleekstraat en omgeving | 0,00 | 0,74 | 0,26 | 0,00 | 0,00 |
| **DOC 4** | Breedstraat en Plompetorengracht en omgeving | 0,05 | 0,95 | 0,00 | 0,00 | 0,00 |
| **DOC 5** | Buiten Wittevrouwen | 0,00 | 0,37 | 0,63 | 0,00 | 0,00 |
| **DOC 6** | Domplein, Neude, Janskerkhof | 0,00 | 0,39 | 0,61 | 0,00 | 0,00 |
| **DOC 7** | Elinkwijk en omgeving | 0,00 | 0,00 | 0,11 | 0,89 | 0,00 |
| **DOC 8** | Het Zand-Oost | 0,00 | 0,20 | 0,80 | 0,00 | 0,00 |
| **DOC 9** | Het Zand-West | 0,00 | 0,00 | 0,00 | 0,96 | 0,04 |
| **DOC 10** | Hoog-Catharijne NS en Jaarbeurs | 0,00 | 0,69 | 0,31 | 0,00 | 0,00 |
| **DOC 11** | Julianapark en omgeving | 0,00 | 0,00 | 0,00 | 0,24 | 0,76 |
| **DOC 12** | Kanaleneiland-Noord | 0,00 | 0,17 | 0,83 | 0,00 | 0,00 |
| **DOC 13** | Kanaleneiland-Zuid | 0,00 | 0,00 | 0,24 | 0,76 | 0,00 |
| **DOC 14** | Laan van Nieuw-Guinea, Spinozaweg e.o. | 0,00 | 0,00 | 0,96 | 0,04 | 0,00 |
| **DOC 15** | Lange Elisabethstraat, Mariaplaats en omgeving | 0,00 | 0,44 | 0,56 | 0,00 | 0,00 |
| **DOC 16** | Lange Nieuwstraat en omgeving | 0,00 | 0,00 | 0,88 | 0,12 | 0,00 |
| **DOC 17** | Lauwerecht | 0,00 | 0,00 | 0,88 | 0,12 | 0,00 |
| **DOC 18** | Leidsche Rijn-Centrum | 0,00 | 0,93 | 0,07 | 0,00 | 0,00 |
| **DOC 19** | Leidseweg en omgeving | 0,00 | 0,00 | 0,99 | 0,01 | 0,00 |
| **DOC 20** | Lombok-Oost | 0,00 | 0,00 | 0,40 | 0,60 | 0,00 |
| **DOC 21** | Lombok-West | 0,00 | 0,34 | 0,66 | 0,00 | 0,00 |
| **DOC 22** | Lunetten-Zuid | 0,00 | 0,94 | 0,06 | 0,00 | 0,00 |
| **DOC 23** | Maarschalkerweerd en Mereveld | 0,07 | 0,93 | 0,00 | 0,00 | 0,00 |
| **DOC 24** | Neckardreef en omgeving | 0,00 | 0,00 | 0,47 | 0,53 | 0,00 |
| **DOC 25** | Nieuw Engeland, Th. a. Kempisplantsoen en omgeving | 0,00 | 0,00 | 0,28 | 0,72 | 0,00 |
| **DOC 26** | Nieuw Hoograven-Zuid | 0,18 | 0,82 | 0,00 | 0,00 | 0,00 |
| **DOC 27** | Nieuwegracht-Oost | 0,00 | 0,24 | 0,76 | 0,00 | 0,00 |
| **DOC 28** | Nobelstraat en omgeving | 0,00 | 0,00 | 0,76 | 0,24 | 0,00 |
| **DOC 29** | Ondiep | 0,00 | 0,00 | 0,13 | 0,87 | 0,00 |
| **DOC 30** | Oog in Al | 0,00 | 0,89 | 0,11 | 0,00 | 0,00 |
| **DOC 31** | Oud Hoograven-Noord | 0,00 | 0,90 | 0,10 | 0,00 | 0,00 |
| **DOC 32** | Oudwijk | 0,00 | 0,00 | 0,91 | 0,09 | 0,00 |
| **DOC 33** | Pijlsweerd-Noord | 0,00 | 0,00 | 0,72 | 0,28 | 0,00 |
| **DOC 34** | Pijlsweerd-Zuid | 0,00 | 0,00 | 0,42 | 0,58 | 0,00 |
| **DOC 35** | Rijnsweerd | 0,32 | 0,68 | 0,00 | 0,00 | 0,00 |
| **DOC 36** | Rivierenwijk | 0,00 | 0,54 | 0,46 | 0,00 | 0,00 |
| **DOC 37** | Schaakbuurt en omgeving | 0,00 | 0,00 | 0,00 | 0,74 | 0,26 |
| **DOC 38** | Schepenbuurt | 0,00 | 0,00 | 0,00 | 0,00 | 1,00 |
| **DOC 39** | Schildersbuurt | 1,00 | 0,00 | 0,00 | 0,00 | 0,00 |
| **DOC 40** | Springweg en omgeving Geertebuurt | 1,00 | 0,00 | 0,00 | 0,00 | 0,00 |
| **DOC 41** | Staatsliedenbuurt | 1,00 | 0,00 | 0,00 | 0,00 | 0,00 |
| **DOC 42** | Taag- en Rubicondreef en omgeving | 0,36 | 0,64 | 0,00 | 0,00 | 0,00 |
| **DOC 43** | Terwijde-Oost | 0,36 | 0,64 | 0,00 | 0,00 | 0,00 |
| **DOC 44** | Tolsteeg en Rotsoord | 0,00 | 0,56 | 0,44 | 0,00 | 0,00 |
| **DOC 45** | Transwijk-Noord | 0,00 | 0,00 | 0,50 | 0,50 | 0,00 |
| **DOC 46** | Tuindorp en Van Lieflandlaan-West | 0,00 | 0,92 | 0,08 | 0,00 | 0,00 |
| **DOC 47** | Tuinwijk-Oost | 0,00 | 0,00 | 0,11 | 0,89 | 0,00 |
| **DOC 48** | Tuinwijk-West | 0,00 | 0,00 | 0,87 | 0,13 | 0,00 |
| **DOC 49** | Utrecht Science Park | 0,00 | 0,00 | 0,87 | 0,13 | 0,00 |
| **DOC 50** | Vleuten | 0,00 | 0,30 | 0,70 | 0,00 | 0,00 |
| **DOC 51** | Vleuterweide-West | 0,00 | 0,00 | 0,84 | 0,16 | 0,00 |
| **DOC 52** | Vogelenbuurt | 0,00 | 0,17 | 0,83 | 0,00 | 0,00 |
| **DOC 53** | Watervogelbuurt | 0,00 | 0,53 | 0,47 | 0,00 | 0,00 |
| **DOC 54** | Welgelegen, Den Hommel | 0,00 | 0,56 | 0,44 | 0,00 | 0,00 |
| **DOC 55** | Wijk C | 0,00 | 0,00 | 0,81 | 0,19 | 0,00 |
| **DOC 56** | Wilhelminapark en omgeving | 0,00 | 0,00 | 0,75 | 0,25 | 0,00 |
| **DOC 57** | Wittevrouwen | 0 | 0 | 0 | 0,92 | 0,08 |
| **DOC 58** | Zeeheldenbuurt, Hengeveldstraat en omgeving | 0 | 0 | 0,02 | 0,98 | 0 |

**Supplementary Material 6:** Utrecht - Results of the Second Utrecht Belongingness Workshop.

| Participant | Individual round | Collective round | Individual round |
| --- | --- | --- | --- |
| **1** | My workplace. Being familiar and being recognized on an unfamiliar place. | Places around the city that evoke a memor, typical recognizable architects. | Places with a memory that I know, where I know the way |
| **2** | n/a | The village look, diversity in people, emotion is an important aspect. | The village look with diversity of people. With places and people that evoke emotion for me. |
| **3** | Lepelenburg, Singel, Ledig erf and knowing your neighbours. Schools and school square. | Friends of the children and their parents. Personal and dependent on your preference groups. | Places you frequent and a lot of social contacts. |
| **4** | Memories of past projects where I worked on, colleagues. | You can join conversation about something in a group. Having emotion in a place, while not living there. | Recognition of places and people, familiarity and evoking emotion are important. |
| **5** | n/a | Being together with friends and colleagues, meeting in the city. Utrecht as a place to meet people. | Utrecht is a place as a node where I meet people. The Stadskantoor is a compact version of that concept. |
| **6** | People that I know live here, knowing where to go, space to stay. | n/a | n/a |
| **7** | Recognizable historic architecture, together with the experiences in the city. | Identity, events, mix of people, social cohesion, walkability. | Conclusion: combination of identity and social cohesion. |
| **8** | I have enough space to do what I want (walk, bike, sit). Others also have this space. I can make contact with others. Small streets with a village appearance, calm little streets. | Feeling freedome and space. Spontaneously bump into an acquaintance on the street. Watching over each other, being concerned of the people in the area. | n/a |
| **9** | My own house, presence of friends, network. | Meeting like-minded people. Inviting space to stimulate/unfold interests, sports or culture. | Space to unfold/bloom. |
| **10** | The cozyness of the concept 'village city'. The coffee bars with good quality. | n/a | Size and scale. Community groups (sports, dog) |
| **11** | Knowing people, memories of events on certain places, small scale, watching out for each other. | Connection to nature, seasons, creating moments to meet each other. Linked to beauty and safety. | The themes are really dependent on each other. Nature and culture combine: dna and experience, psychology of surroundings with aesthetics and building logics, ego with surroundings. |
| **12** | n/a | Having friends around, a cosy home as base, contact with your surroundings/neighbours, local farmer knows me, knowing your way and places, knowing your places in the social web. Having personal memories of a place. | n/a |
| **13** | I feel more of a visitor, gnarliness. | Open and progressive attitude. | The culture is important for the feeling of belonging/feeling at home in Utrecht. |
| **14** | The city office, a social place where I know people. The language, I get what people mean and the unwritten rules. People know me. You can also act like you belong, like a tourist in a new city. Act like a local for 1 day and the cafe around the corner knows how you like your coffee. | n/a | n/a |
| **15** | Scale and lunch walks | Specific places. | n/a |
| **16** | n/a | Community centre. An open ambience and a place to meet other people. People engaging in various activities. Social network, people you can relate to, a place for leisure activities. | Belonging is not about the place, but it is about the people that make you feel at home. You meet these groups at places in the city (gym, church, coffee corner). |
| **17** | Lage Weide, the office. | Knowing the people around, connection to your own city, like-minded people. | Familiar people, like-minded ones, routines, familiarness, my city. |
| **18** | Recognizable home, knowing neighbours, the factor of time, going through phases in life in Utrecht, memories, a pleasant home, knowing where you are. | n/a | Social network, history, memories of places in the city, a place to retreat. |
| **19** | I can be myself everywhere, I enjoy the city and it offers. The cafe where you always go. | Memories of places, relationships with seasons, places where you go often. | I have changed countries several times. But in a way, I always belonged to each place. Because I managed to find my micro-life back (network) |
| **20** | Lots of terraces, clearly defined area, clear feeling of non-anonymous. | n/a | A place that naturally feels as a place for everyone: non anonymous, place to meet, inclusive. |
| **21** | Familiarity/identity of a place. | n/a | People, mindset, familiarity |
| **22** | The people that I am familiar with, but also the space on the street to bike and walk (since I consciously do not have a car) | Like-minded people, the library, no anonymous place. | Non anonymous place with like-minded people and space. |
| **23** | Being with the people I know, girlfriend, friends, collegues. | Social circle (I do not live here) | Social contacts in a city full of strangers/individuals. |
| **24** | My colleagues | This is alsways about people, or dogs. | n/a |
| **25** | Meeting ''fun'' people, culture, joining events (concerts, movies, etc) | Feeling free, then connecting to other people. Friends, network, developing. | Belonging starts with individual freedom. |
| **26** | Home | Living together, memories, involvement/engagement | Knowing people around you and feeling included. Being able to join if you feel like. |
| **27** | Inclusive, visible queer friendly places, diversity of people in public spaces, hearing the athan (call of the prayer from the mosque) | Dualty of: gnarliness (culture) and the progressive city. Visitable city, lots of people pass. | It's a city with a duality in its identity: its gnarliness/village like in how it is developed and at the same time very progressive. It is inclusive, it is a big city for everyone. You hear the athan from the mosque while passing by queer spaces. It is beautifully diverse. |
| **28** | Safety, cosiness | Mix of people and togetherness. | Connecting vibrancy, safety, belonging and beauty to design principles is interesting. It is possible to have different ways of looking at designing. |
| **29** | A feeling of belonging, familiarity in surroundings, like seeing the Domtoren. | People make it feel like home, this is connected to vibrance. | People create the feeling of being home. |
| **30** | Human scale, small and cosy, quickly with the bike, enough to do. | n/a | n/a |
| **31** | Village feeling, gnarliness, human scale, common interests. | n/a | n/a |
| **32** | n/a | n/a | Understanding how social structures work, even though you are not part of it. More (positive) memories in a certain place. |
